# Supplementary material
Source: PubMed Central journal article supplement (PMC3898853)
Supplement: NIHMS478338-supplement-1_si_001.pdf [file NIHMS478338-supplement-1_si_001.pdf]

**Supplementary Material**

**Stabilization of an unusual salt bridge in ubiquitin by the extra C-terminal domain of the proteasome-associated deubiquitinase UCH37 as a mechanism of its exo specificity**

Marie E. Morrow<sup>1,#</sup>, MyungIl Kim<sup>1,#</sup>, Judith A. Ronau<sup>1</sup>, Michael J. Sheedlo<sup>1</sup>, Rhiannon R. White<sup>2</sup>, Joseph Chaney<sup>1</sup>, Lake N. Paul<sup>3</sup>, Markus A. Lill<sup>4</sup>, Katerina Artavanis-Tsakonas<sup>2</sup>, Chittaranjan Das<sup>1,\*</sup>

## Supplementary Figures

### Supplementary Figure 1.

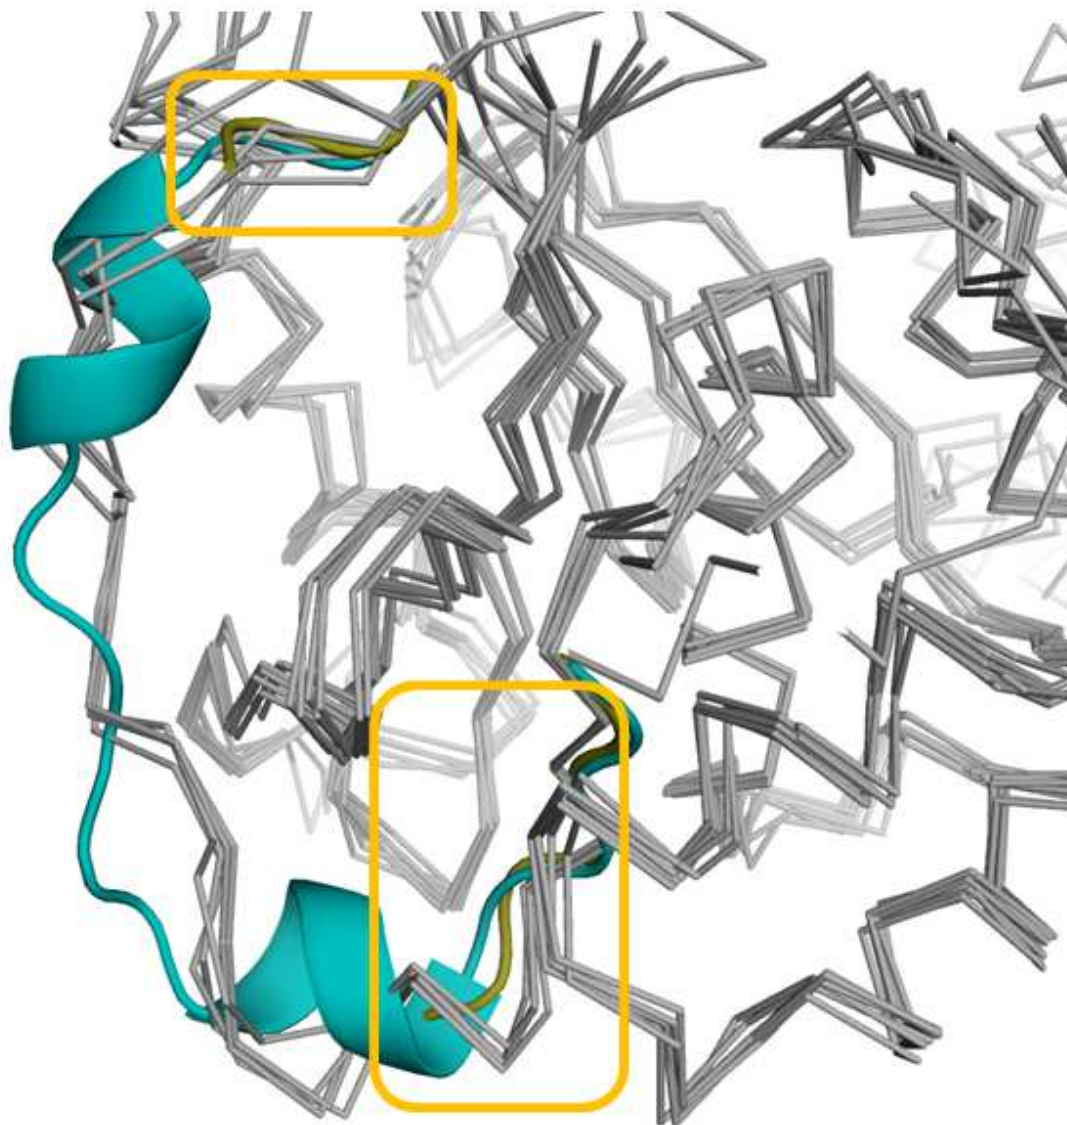

**Figure S1:** Superposition of all human UCH37 structures (PDB IDs 3IHR, 3RIS, 3RII, 3A7S, 3TB3) with TsUCH37<sup>cat</sup>-UbVME (teal) and TsUCH37<sup>ΔC46</sup>-UbVME (olive). Residues 57-71 are missing in TsUCH37<sup>ΔC46</sup>-UbVME, as highlighted by the orange boxes.

Supplementary Figure 2.

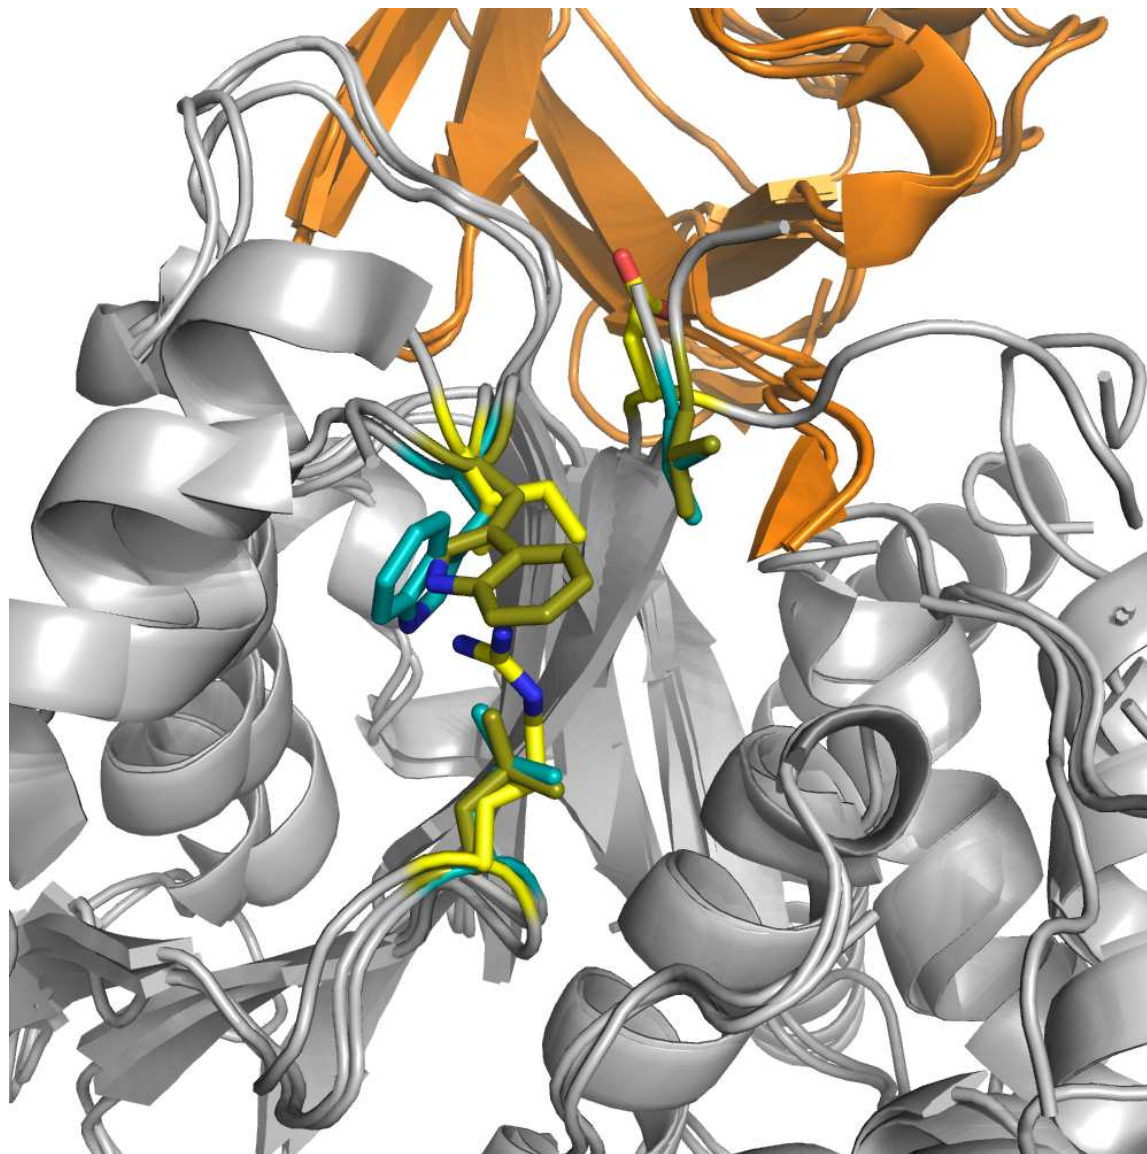

**Figure S2:** Dynamics of Trp55 from the structures of the TsUCH37-UbVME constructs. TsUCH37 <sup>$\Delta$ C46</sup>-UbVME is shown in olive, TsUCH37<sup>cat</sup>-UbVME is shown in teal, UbVME is orange, and also shown is the analogous residue in the UCHL3-UbVME structure (PDB ID 1XD3), Ile58, in yellow.



Supplementary Figure 4.

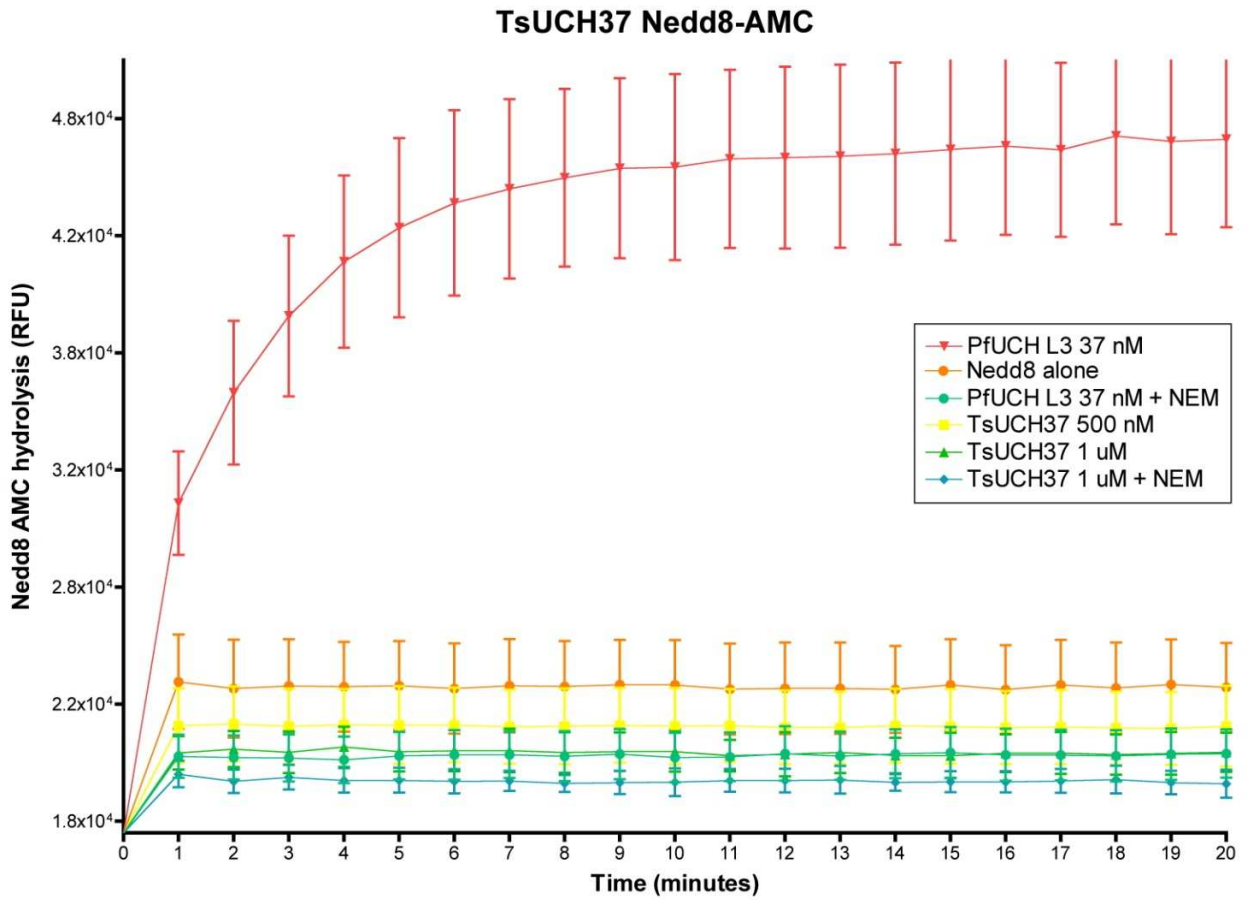

**Figure S4:** NEDD8-AMC hydrolysis assay using TsUCH37, the same assay was used to investigate PfUCHL3, a dual ubiquitin and NEDD8 C-terminal hydrolase.
